# Supplementary material for: Exploring K2G30 Genome: A High Bacterial Cellulose Producing Strain in Glucose and Mannitol Based Media
Source: Front Microbiol. 2019 Jan 30;10:58. doi: 10.3389/fmicb.2019.00058 (PMC6363697; doi:10.3389/fmicb.2019.00058)
Supplement: TABLE S1 — ANIb pairwise similarity values for all Komagataeibacter genome sequences (n = 21). [file Table_1.xlsx]

## Sheet: ANIb matrix
Genomes	K. hansenii AY201	K. europaeus LMG 18890	G. oxydans DSM 3503	K2G30	K. nataicola RZS01	K. xylinus ATCC 53582	K. europaeus LMG 18494	K. europaeus NBRC 3261	K. intermedius TF2	K. xylinus NBRC 15237T	K. hansenii JCM 7643	K. hansenii ATCC 23769	K. kakiaceti JCM 25156	K. xylinus NBRC 13693	K. hansenii NQ5	K. oboediens 174Bp2	K. intermedius AF2	K. xylinus E25	G. albidus LMG 1356	K. europaeus CECT 8546	K. rhaeticus AF1
K. hansenii AY201	1.0	0.7827201646903821	0.7257934710743803	0.7739418309859155	0.7725196630727763	0.9873125618682468	0.7780466041527125	0.7748203747397641	0.7789083916554509	0.7723831661016949	0.9998618130311614	0.998994609079445	0.7833708196721313	0.7730613242662849	0.9873443695424379	0.7777985494652407	0.7792943859649123	0.77696654230513	0.7274785051546391	0.7816604302477184	0.7782082749504297
K. europaeus LMG 18890	0.7848884662576688	1.0	0.7372411966987621	0.8530633459357279	0.842493264977885	0.7785699382334775	0.9721771157959057	0.9730977455138664	0.8940540876176684	0.8519409666283084	0.7849732939787485	0.7800559214501511	0.8531161350345562	0.8887488963874554	0.7786467227414331	0.9000839912722391	0.8962579675346636	0.9178679247104248	0.733324504249292	0.9816757676825763	0.860609513888889
G. oxydans DSM 3503	0.7296804390243902	0.7334440828402368	1.0	0.7322075070821529	0.73265104434907	0.7281608846761454	0.7353487375886525	0.7336013716814159	0.7318454661016949	0.7310354363376251	0.7288342879499217	0.7236792431561997	0.7399933151183972	0.7303610419681621	0.7281404912836769	0.7305335948644793	0.7314513370473538	0.7320664346590909	0.8559017434961205	0.7328055763688761	0.7321749150141643
K.2G30	0.7713327380170715	0.8424665562913909	0.7295284492753623	1.0	0.9179064138908575	0.7698533784655063	0.8415603468697124	0.8394168491960017	0.8398691211101766	0.9331523393681223	0.7717400126823081	0.7701264571428571	0.8398170954106281	0.8309102903081734	0.7697822365869424	0.8407486354541817	0.8442022094861661	0.8457126025694157	0.7264204888888888	0.8453193413654618	0.8489562362525459
K. nataicola RZS01	0.771228877076412	0.8368637412891987	0.7325134177215189	0.9210862047353761	1.0	0.7710515117801048	0.8389316892778993	0.8359954011653967	0.8354558588548602	0.9175515747168431	0.7716209260450161	0.7690163081967212	0.8382400833867863	0.8294009158530915	0.7710999078341014	0.8336209865858937	0.8425835101533362	0.8408976141257536	0.7318467468175389	0.8416574334442597	0.842086063230836
K. xylinus ATCC 53582	0.9875606330472103	0.7757878898473789	0.7247617868852458	0.7714892066666668	0.7705912170385396	1.0	0.7752065284280937	0.7743933939393939	0.7757823375753516	0.769428176907495	0.9897644852697783	0.9891016937053861	0.780695461056401	0.7726376790633609	0.9998388875379939	0.7736699796472184	0.775704090314136	0.7754697366688612	0.7247450253807106	0.7762606718851924	0.7725504031725049
K. europaeus LMG 18494	0.7828513175885644	0.9757173816155988	0.7422004719387755	0.8514451610399689	0.8442053904991949	0.7812676521204672	1.0	0.9805384302510328	0.8929093972804116	0.847674100283057	0.7831531279904306	0.7781870700245701	0.8586167204580947	0.8883724385328496	0.7810356427688504	0.8918479514632405	0.8941897281282677	0.9159924748490945	0.7410708377659575	0.9775596869300911	0.8552611447419481
K. europaeus NBRC 3261	0.7801240038192235	0.9751960260482848	0.7339983240223463	0.8479386182392421	0.8424527815906339	0.7792423143564357	0.9813765625956535	1.0	0.8932600189035916	0.8449881957928803	0.7807981405208964	0.7786997179644389	0.8521849673202613	0.8870081052631578	0.7793277128651336	0.8887975203252033	0.8928801171303075	0.9131369304556354	0.7353820891364903	0.9784295603715171	0.8509717898832685
K. intermedius TF2	0.7818051983173077	0.902241230964467	0.7321586394557824	0.8624057318695941	0.8513983424209377	0.7765685508982036	0.8982293000648087	0.8997467829326108	1.0	0.8605704121925873	0.7818762260869564	0.7794276760563381	0.8607276070409133	0.942428296203326	0.7766485071942446	0.9425929644158028	0.9958246730724163	0.9033669004033509	0.7342380779569894	0.9026031364749082	0.8674466590612778
K. xylinus NBRC 15237T	0.7717888007994671	0.8392805074257426	0.7304000571428572	0.9313390715268226	0.9138066594124048	0.7698686632057106	0.8389025647558387	0.8362732540025963	0.8356716081491115	1.0	0.7719864440203563	0.7699938199356913	0.8351710692212609	0.8288286944818305	0.7696833116460637	0.8376655714870954	0.8434298605021922	0.8431494719607041	0.727704237037037	0.8423994240837697	0.8451290362438221
K. hansenii JCM 7643	0.9982847574200914	0.783759877408056	0.7294642391304349	0.7779563132817154	0.7756727925211098	0.9874252231206948	0.7804161538461538	0.7776709571162213	0.7817198763250882	0.7761980097680098	1.0	0.9991356657608695	0.7843857907742998	0.7737420784313725	0.9874508583433373	0.778105901937046	0.7817221334854536	0.7787763593099346	0.7308956942277692	0.783085582072177	0.7819134147794994
K. hansenii ATCC 23769	0.9981812572161642	0.7797373148744364	0.7215305120000001	0.7715179735973596	0.7703318382352942	0.9882639883457429	0.7768225376062786	0.7736747261663286	0.7778973018991486	0.7703213360053439	0.9999425075895569	1.0	0.780498160291439	0.77210838028169	0.9881688564949788	0.7751537367021277	0.7779736885768985	0.7753697395833336	0.7244231301482701	0.7787171630295251	0.7748653051948052
K. kakiaceti JCM 25156	0.7790352265265922	0.8436803058103974	0.733557914951989	0.8382399322799097	0.833926013888889	0.7785099036608863	0.8447044717229285	0.8448595217006201	0.8399633678523187	0.8342712258368694	0.7792276211734693	0.77739446084724	1.0	0.8359416518066637	0.7785037966537967	0.8413900803930325	0.841405008650519	0.8434607567804023	0.7315608608321378	0.8449857881462801	0.8422712420382166
K. xylinus NBRC 13693	0.7736535433604337	0.8867556370192309	0.7314644096728309	0.8348199782419495	0.830853468104223	0.7737621948051948	0.8871703365774534	0.887512213836478	0.9445329200819673	0.8318516152125279	0.774285427824951	0.7720722823218997	0.8415131879606881	1.0	0.7736676577748861	0.9858580025982463	0.9426364041209705	0.8843789800893945	0.7334482299546143	0.88639891363814	0.8399257489361702
K. hansenii NQ5	0.9878660120953398	0.7755668501326259	0.7265957817589576	0.7711462967914439	0.7706028872282609	0.9998898854386495	0.7751679757901816	0.7754453646898432	0.7759229649595687	0.7698714180107527	0.990033442352164	0.9890443102888674	0.78200522833178	0.7726125051759835	1.0	0.7731625526137136	0.775856561264822	0.775945370741483	0.7262391016949153	0.776526703873933	0.7728486843853821
K. oboediens 174Bp2	0.785851255952381	0.8989463872930046	0.741994610303831	0.8486121069989007	0.8369088057901085	0.7799940586797065	0.8910738194945848	0.8880379011406844	0.94344596318629	0.8435075965996909	0.7853423614318706	0.7785965409934171	0.8508587029972752	0.9849137152888605	0.7795842276923076	1.0	0.9426667707404103	0.8923430698981383	0.7404440373563219	0.8982645143047238	0.8573061205341033
K. intermedius AF2	0.7813959659424543	0.8950711190864601	0.7368843656716417	0.8519267721088436	0.8449695982468955	0.77619007629108	0.8920146763062766	0.8920105023156394	0.9942600808555034	0.8514559398230089	0.7810387711386696	0.7777885025524676	0.8522295249755142	0.9402444738500316	0.7762317577895356	0.938371868131868	1.0	0.8942543458838546	0.7343694184576485	0.8950680012414651	0.8592568245033112
K. xylinus E25	0.776813933376041	0.9153295609413418	0.733632828854314	0.8495884609053499	0.8399788421955403	0.7753276139240507	0.9148924396396396	0.9137325767790262	0.8912598174757281	0.8454946766791822	0.7779695235148515	0.773436335443038	0.8476350406032483	0.8841304407484407	0.7752793464467004	0.8885126223908918	0.8937594072447861	1.0	0.7335074821173104	0.9154666967569377	0.8514261283728537
G. albidus LMG 1356	0.7275479965156795	0.7303846238244514	0.8555731713900134	0.7269572423802613	0.7289240469208211	0.7238996488294314	0.7314491371340524	0.7321073510971787	0.7307317611026034	0.7262642961876832	0.726244935064935	0.7240756333333332	0.7350376335877862	0.7285621169036335	0.7239149078726969	0.729626530612245	0.7306330058651027	0.7309851885369533	1.0	0.7300390345821326	0.7287493171471928
K. europaeus CECT 8546	0.7814379874213836	0.9839536396724295	0.731086985915493	0.8513541443538999	0.8394255043227666	0.7778502194357367	0.9772615446114488	0.9783451503006012	0.8919606114839672	0.8462955191693291	0.7810240438489647	0.7786571005552128	0.8517172702702703	0.8862976137712703	0.7777927886435331	0.8953840716040716	0.894676382170007	0.9160169947506561	0.728236064257028	1.0	0.8586610974201001
K. rhaeticus AF1	0.7770703789338472	0.8560541597469356	0.7328541242937853	0.85282081496063	0.8384559338772004	0.7719165245478036	0.8492285679012346	0.8446875179098189	0.8474533123276881	0.8486078773006135	0.7768005808869458	0.7743347544080605	0.846197401902497	0.8382393079584776	0.771806727154893	0.8528041525742203	0.8572489139941692	0.8532847075208914	0.7330076374442794	0.8592893619445501	1.0
