# Supplementary material for: Exploring K2G30 Genome: A High Bacterial Cellulose Producing Strain in Glucose and Mannitol Based Media
Source: Front Microbiol. 2019 Jan 30;10:58. doi: 10.3389/fmicb.2019.00058 (PMC6363697; doi:10.3389/fmicb.2019.00058)
Supplement: TABLE S2 — TETRA pairwise similarity values for all Komagataeibacter genome sequences (n = 21). [file Table_2.xlsx]

## Sheet: TETRA_correlations
Genomes	G. albidus LMG 1356	G. oxydans DSM 3503	K2G30	K. europaeus CECT 8546	K. europaeus LMG 18494	K. europaeus LMG 18890	K. europaeus NBRC 3261	K. hansenii ATCC 23769	K. hansenii AY201	K. hansenii JCM 7643	K. hansenii NQ5	K. intermedius AF2	K. intermedius TF2	K. kakiaceti JCM 25156	K. nataicola RZS01	K. oboediens 174Bp2	K. rhaeticus AF1	K. xylinus ATCC 53582	K. xylinus E25	K. xylinus NBRC 13693	K. xylinus NBRC 15237T
G. albidus LMG 1356	1.0	0.9718539322682843	0.6938887814709229	0.7260581778890892	0.7202862239431497	0.7280757955990759	0.7060469436712461	0.6844333323120875	0.68629001803474	0.6919742294191994	0.6686271954198876	0.7423668995417537	0.725193148989846	0.7488968839262982	0.7165249417304622	0.7355577684305064	0.7315466528853712	0.6689141971401839	0.7108572601940656	0.7015098212221076	0.7119665489857409
G. oxydans DSM 3503	0.9718539322682843	1.0	0.7381774545946382	0.7531225010476672	0.7474887799131297	0.7570261270574009	0.7350975277320078	0.6785468849658858	0.6816553899904365	0.6862252515482604	0.6628272928107217	0.7649111931022908	0.7504482072788053	0.7784564879538192	0.7490779658165273	0.7581636309012927	0.7660645118028219	0.6631126301121161	0.7385576581354821	0.7250843430056494	0.749739124927954
K2G30	0.6938887814709229	0.7381774545946382	1.0	0.9243915974409906	0.9232493070807541	0.9215280395494371	0.922245745722737	0.7726690563565544	0.7740122768974917	0.7792607409902204	0.7658204085755302	0.9197342055335298	0.9191265234751382	0.9427113084608233	0.9951835051724722	0.9168444663906918	0.9497741901995496	0.7659272834312366	0.9339559759604845	0.9116066433314184	0.9972958088990389
K. europaeus CECT 8546	0.7260581778890892	0.7531225010476672	0.9243915974409906	1.0	0.999254046380353	0.9986252658847863	0.9985616765583136	0.8945196191807299	0.8948532776879792	0.8975880318362381	0.8882323441855233	0.9959034435136978	0.9955781684271519	0.9713593089505229	0.918161130017501	0.9948087950635897	0.9681323044350858	0.8883137831248575	0.9943676936874957	0.9900655241624826	0.9199783037838953
K. europaeus LMG 18494	0.7202862239431497	0.7474887799131297	0.9232493070807541	0.999254046380353	1.0	0.998573675136509	0.998805094546976	0.8921688007694786	0.8930025484881965	0.8955252995839627	0.8858111307970964	0.9953361355139405	0.9951187258211451	0.969010544550872	0.91614764628354	0.994481317668696	0.9677170439568276	0.8858964098147561	0.9944338008234683	0.989499727402007	0.9185718625002733
K. europaeus LMG 18890	0.7280757955990759	0.7570261270574009	0.9215280395494371	0.9986252658847863	0.998573675136509	1.0	0.9975328114142585	0.8954787572914849	0.8965170621790184	0.8987468223641144	0.888655521729055	0.9955634116395822	0.9950428274958918	0.9695123570991372	0.914561204410276	0.9945118371353922	0.9656461624120017	0.8887429770812051	0.9940021191621985	0.9881518498618705	0.9169245851158665
K. europaeus NBRC 3261	0.7060469436712461	0.7350975277320078	0.922245745722737	0.9985616765583136	0.998805094546976	0.9975328114142585	1.0	0.8934134510481829	0.8942716187976036	0.8965284976482517	0.8881475769431018	0.9939689930813921	0.9953794151683901	0.9680137338463418	0.9140358678392717	0.9940277242201843	0.9660469853135698	0.888210377587652	0.9944661988646951	0.9921284256522835	0.9157639530637954
K. hansenii ATCC 23769	0.6844333323120875	0.6785468849658858	0.7726690563565544	0.8945196191807299	0.8921688007694786	0.8954787572914849	0.8934134510481829	1.0	0.9993749849437853	0.9992909058996495	0.9991410865816184	0.8943894445047017	0.8949566647984993	0.8596605005180336	0.7709128975948762	0.8991459108504192	0.8418149085610289	0.9991498613753295	0.8918045990589544	0.8972015999423075	0.7686847024025262
K. hansenii AY201	0.68629001803474	0.6816553899904365	0.7740122768974917	0.8948532776879792	0.8930025484881965	0.8965170621790184	0.8942716187976036	0.9993749849437853	1.0	0.9991427088407422	0.9984230109470766	0.8951203074816981	0.8959610504502533	0.8616595303466977	0.7718945435231138	0.899794302000589	0.84479832697329	0.9984517610504788	0.8931916340920881	0.8977434813345926	0.7695300598646934
K. hansenii JCM 7643	0.6919742294191994	0.6862252515482604	0.7792607409902204	0.8975880318362381	0.8955252995839627	0.8987468223641144	0.8965284976482517	0.9992909058996495	0.9991427088407422	1.0	0.9981923447430604	0.8975828203921585	0.8978127523751765	0.8643646553999895	0.7778978431096202	0.9022998400905006	0.8472845364672771	0.9982025534891794	0.895444950476499	0.8989782912090227	0.775439216687478
K. hansenii NQ5	0.6686271954198876	0.6628272928107217	0.7658204085755302	0.8882323441855233	0.8858111307970964	0.888655521729055	0.8881475769431018	0.9991410865816184	0.9984230109470766	0.9981923447430604	1.0	0.8870598804605594	0.8887965350016473	0.8506600406278243	0.7641851092978345	0.892762256244846	0.8335741197238061	0.9999920717273132	0.8854899513062773	0.8934539226267518	0.7609304896246007
K. intermedius AF2	0.7423668995417537	0.7649111931022908	0.9197342055335298	0.9959034435136978	0.9953361355139405	0.9955634116395822	0.9939689930813921	0.8943894445047017	0.8951203074816981	0.8975828203921585	0.8870598804605594	1.0	0.9987925577107312	0.9672799134446826	0.9149831830601616	0.9974294979043666	0.9641208416526993	0.8872070559965421	0.9889602779545963	0.9917901090813409	0.9155025475879439
K. intermedius TF2	0.725193148989846	0.7504482072788053	0.9191265234751382	0.9955781684271519	0.9951187258211451	0.9950428274958918	0.9953794151683901	0.8949566647984993	0.8959610504502533	0.8978127523751765	0.8887965350016473	0.9987925577107312	1.0	0.9671392612723749	0.9130799397756588	0.9974806030430673	0.9622957603846841	0.888923467596884	0.9896614117880549	0.995346573934148	0.9135466502957424
K. kakiaceti JCM 25156	0.7488968839262982	0.7784564879538192	0.9427113084608233	0.9713593089505229	0.969010544550872	0.9695123570991372	0.9680137338463418	0.8596605005180336	0.8616595303466977	0.8643646553999895	0.8506600406278243	0.9672799134446826	0.9671392612723749	1.0	0.9370232253012925	0.9640732654859209	0.9649982822079273	0.850734394900101	0.9758348032443767	0.9592873168878604	0.9392215036923832
K. nataicola RZS01	0.7165249417304622	0.7490779658165273	0.9951835051724722	0.918161130017501	0.91614764628354	0.914561204410276	0.9140358678392717	0.7709128975948762	0.7718945435231138	0.7778978431096202	0.7641851092978345	0.9149831830601616	0.9130799397756588	0.9370232253012925	1.0	0.9108492209693525	0.9412240247636178	0.7643368364134323	0.9262001044287341	0.9043275694852234	0.9967904741773059
K. oboediens 174Bp2	0.7355577684305064	0.7581636309012927	0.9168444663906918	0.9948087950635897	0.994481317668696	0.9945118371353922	0.9940277242201843	0.8991459108504192	0.899794302000589	0.9022998400905006	0.892762256244846	0.9974294979043666	0.9974806030430673	0.9640732654859209	0.9108492209693525	1.0	0.9611222579613657	0.892856504642056	0.9877534347471791	0.994830138545246	0.9119569039677548
K. rhaeticus AF1	0.7315466528853712	0.7660645118028219	0.9497741901995496	0.9681323044350858	0.9677170439568276	0.9656461624120017	0.9660469853135698	0.8418149085610289	0.84479832697329	0.8472845364672771	0.8335741197238061	0.9641208416526993	0.9622957603846841	0.9649982822079273	0.9412240247636178	0.9611222579613657	1.0	0.8335536730079985	0.971323850251797	0.9524779929174993	0.9456099183001155
K. xylinus ATCC 53582	0.6689141971401839	0.6631126301121161	0.7659272834312366	0.8883137831248575	0.8858964098147561	0.8887429770812051	0.888210377587652	0.9991498613753295	0.9984517610504788	0.9982025534891794	0.9999920717273132	0.8872070559965421	0.888923467596884	0.850734394900101	0.7643368364134323	0.892856504642056	0.8335536730079985	1.0	0.8855936398976862	0.8935457164805541	0.7610917869453704
K. xylinus E25	0.7108572601940656	0.7385576581354821	0.9339559759604845	0.9943676936874957	0.9944338008234683	0.9940021191621985	0.9944661988646951	0.8918045990589544	0.8931916340920881	0.895444950476499	0.8854899513062773	0.9889602779545963	0.9896614117880549	0.9758348032443767	0.9262001044287341	0.9877534347471791	0.971323850251797	0.8855936398976862	1.0	0.9829400444402738	0.9281934471030623
K. xylinus NBRC 13693	0.7015098212221076	0.7250843430056494	0.9116066433314184	0.9900655241624826	0.989499727402007	0.9881518498618705	0.9921284256522835	0.8972015999423075	0.8977434813345926	0.8989782912090227	0.8934539226267518	0.9917901090813409	0.995346573934148	0.9592873168878604	0.9043275694852234	0.994830138545246	0.9524779929174993	0.8935457164805541	0.9829400444402738	1.0	0.9041970911617909
K. xylinus NBRC 15237T	0.7119665489857409	0.749739124927954	0.9972958088990389	0.9199783037838953	0.9185718625002733	0.9169245851158665	0.9157639530637954	0.7686847024025262	0.7695300598646934	0.775439216687478	0.7609304896246007	0.9155025475879439	0.9135466502957424	0.9392215036923832	0.9967904741773059	0.9119569039677548	0.9456099183001155	0.7610917869453704	0.9281934471030623	0.9041970911617909	1.0
